# Supplementary material for: High sink strength prevents photosynthetic down-regulation in cassava grown at elevated CO2 concentration
Source: PubMed Central journal article supplement (PMC7853607; doi:10.1093/jxb/eraa459), 2020-10-12
Supplement: eraa459_suppl_supplementary_file002.pdf [file eraa459_suppl_supplementary_file002.pdf]

## **SUPPLEMENTARY INFORMATION**

### **HIGH SINK-STRENGTH PREVENTS PHOTOSYNTHETIC DOWN-REGULATION IN CASSAVA GROWN AT ELEVATED CO<sub>2</sub> CONCENTRATION**

Ursula M. Ruiz-Vera<sup>1</sup>, Amanda P. De Souza<sup>1</sup>, Michael R. Ament<sup>1</sup>, Roslyn M. Gleadow<sup>2</sup>, Donald R. Ort<sup>1,3\*</sup>

<sup>1</sup> Carl R. Woese Institute for Genomic Biology, University of Illinois at Urbana-Champaign, Urbana, Illinois, USA.

<sup>2</sup> School of Biological Sciences, Monash University, Clayton, Victoria, Australia

<sup>3</sup> Departments of Plant Biology and Crop Sciences, University of Illinois at Urbana-Champaign, Urbana, Illinois, USA.

\*Corresponding author: Donald R. Ort: [d-ort@illinois.edu](mailto:d-ort@illinois.edu)

**Dataset S1**

Raw data to which the  $A/C_i$  curves at 28°C were fit from eight cultivars of cassava grown at ambient and elevated [CO<sub>2</sub>]. See excel file.

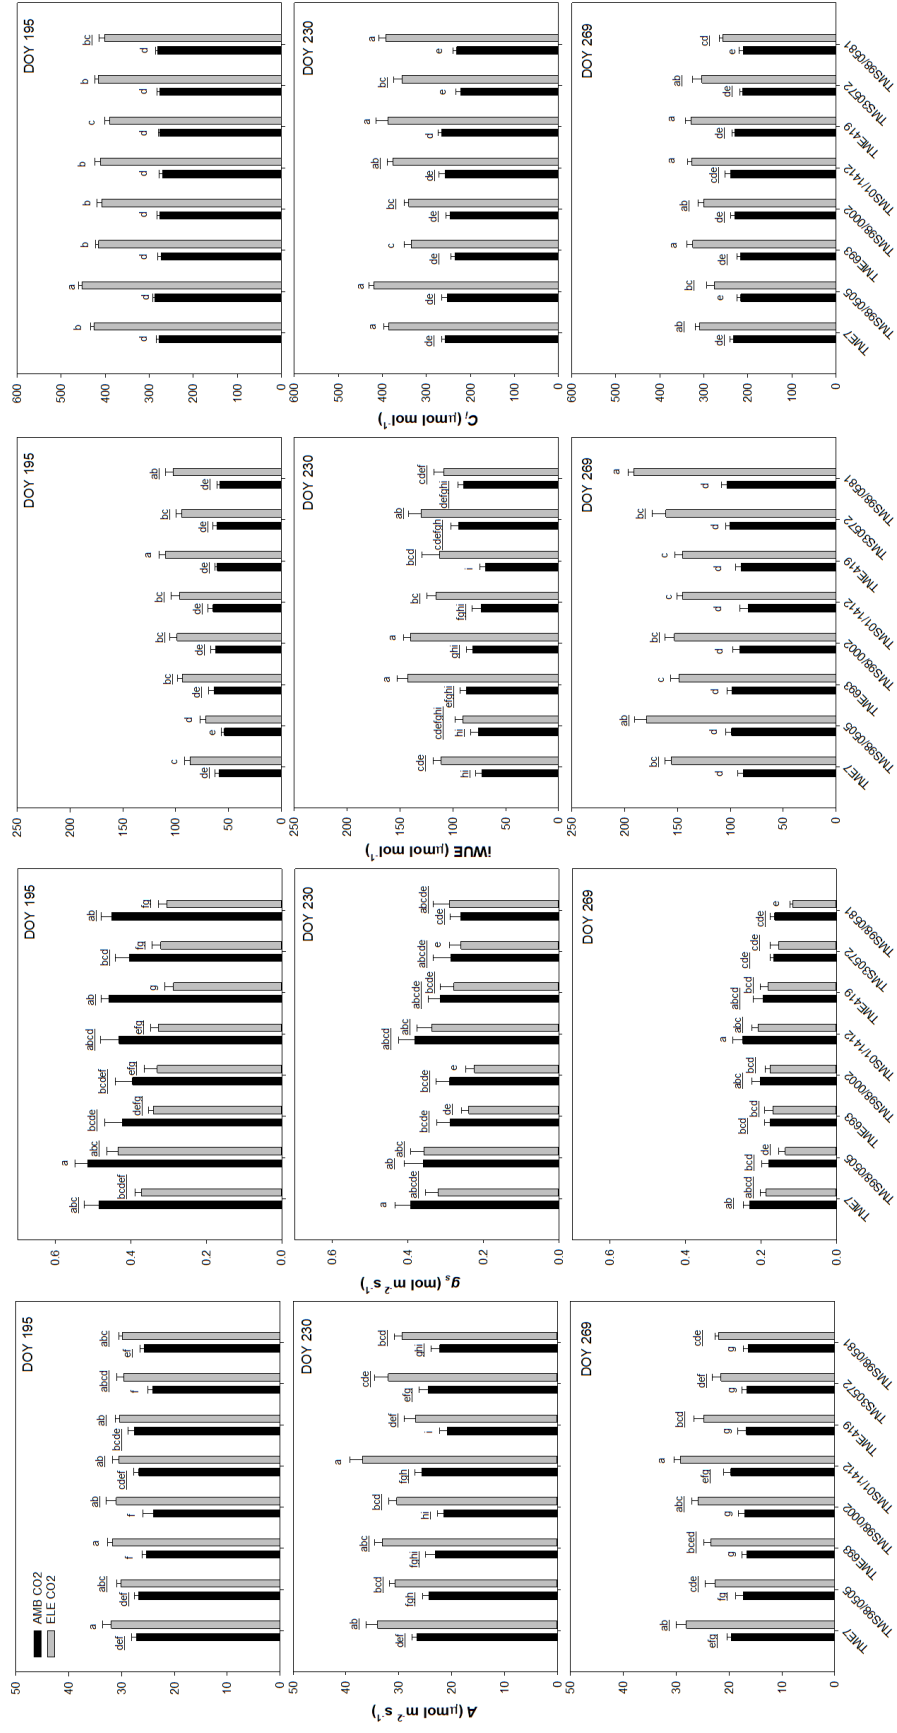

Cultivar

Figure S1. Per day average of gas exchange parameters from eight cultivars of cassava at ambient (AMB CO<sub>2</sub>) and elevated [CO<sub>2</sub>] (ELE CO<sub>2</sub>). Photosynthetic carbon uptake ( $A$ ,  $\mu\text{mol CO}_2 \text{ m}^{-2} \text{ s}^{-1}$ ), stomatal conductance ( $g_s$ ,  $\text{mol H}_2\text{O m}^{-2} \text{ s}^{-1}$ ), intrinsic water use efficiency (iWUE,  $\mu\text{mol mol}^{-1}$ ), and [CO<sub>2</sub>] inside the leaf ( $C_i$ ,  $\mu\text{mol mol}^{-1}$ ) from eight cultivars of cassava at grown ambient (AMB CO<sub>2</sub>) and elevated [CO<sub>2</sub>] (ELE CO<sub>2</sub>). The days of the year (DOY) when the measurements were taken are indicated in each panel. Error bars are mean  $\pm$  standard error (SE;  $n=4$ ). Treatments with different letters represent significant differences ( $p<0.1$ ), underlying is used to help differentiate group of letters.

DOY 199-202

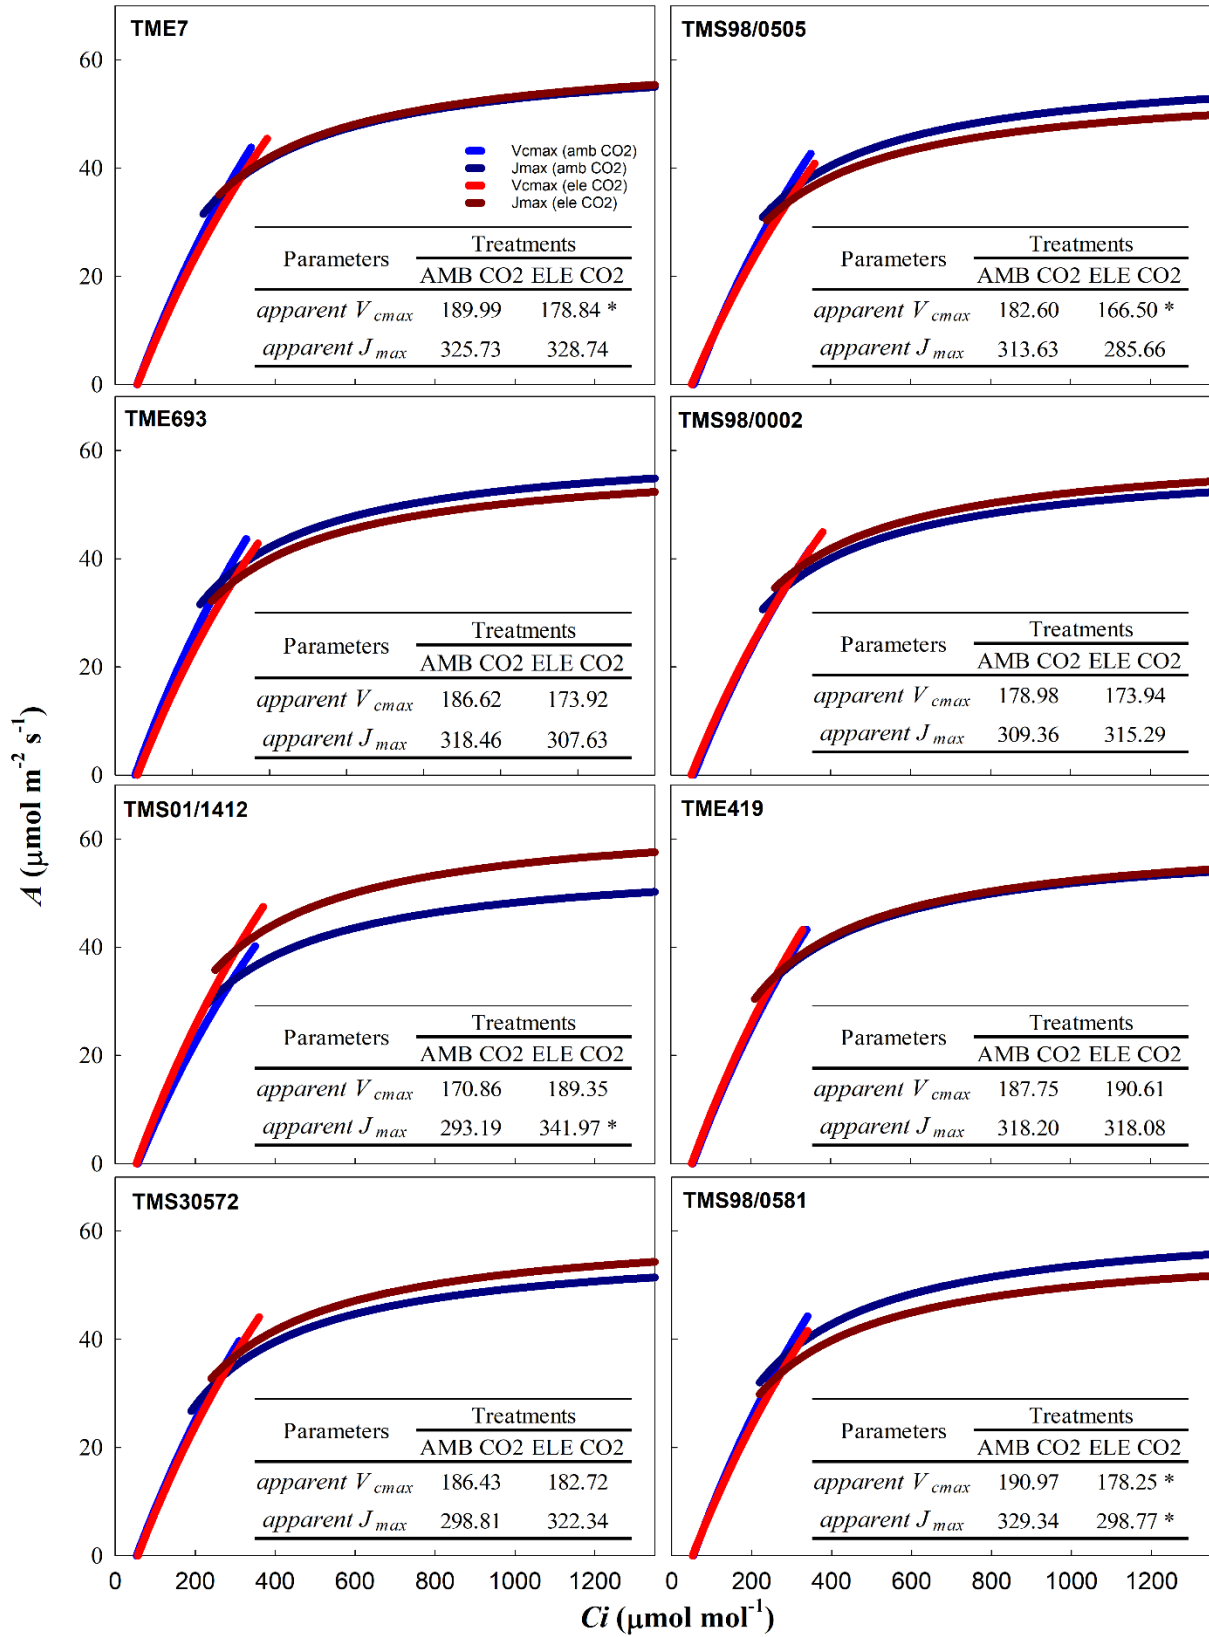

Figure S2. Fitted responses of  $A/C_i$  curves at 28°C from eight cultivars of cassava grown at ambient (AMB CO<sub>2</sub>) and elevated [CO<sub>2</sub>] (ELE CO<sub>2</sub>) during the day of the year (DOY) 199-202. The mean apparent  $V_{cmax}$  ( $\mu\text{mol m}^{-2} \text{s}^{-1}$ , SE <3.6-9.1>) and apparent  $J_{max}$  ( $\mu\text{mol m}^{-2} \text{s}^{-1}$ , se <8.1-17.8>) are indicated in the inserted tables. Significant differences are indicated with ‘\*’ ( $p<0.1$ ). Ambient [CO<sub>2</sub>] treatments are represented by blue lines and the elevated [CO<sub>2</sub>] treatments by red lines. The raw data to which the lines are fit are in Supplementary Dataset S1. Mean leaf temperature for the raw data was between 30.7°C for TME7 and 31.8°C for TMS98/0581.

DOY 226-229

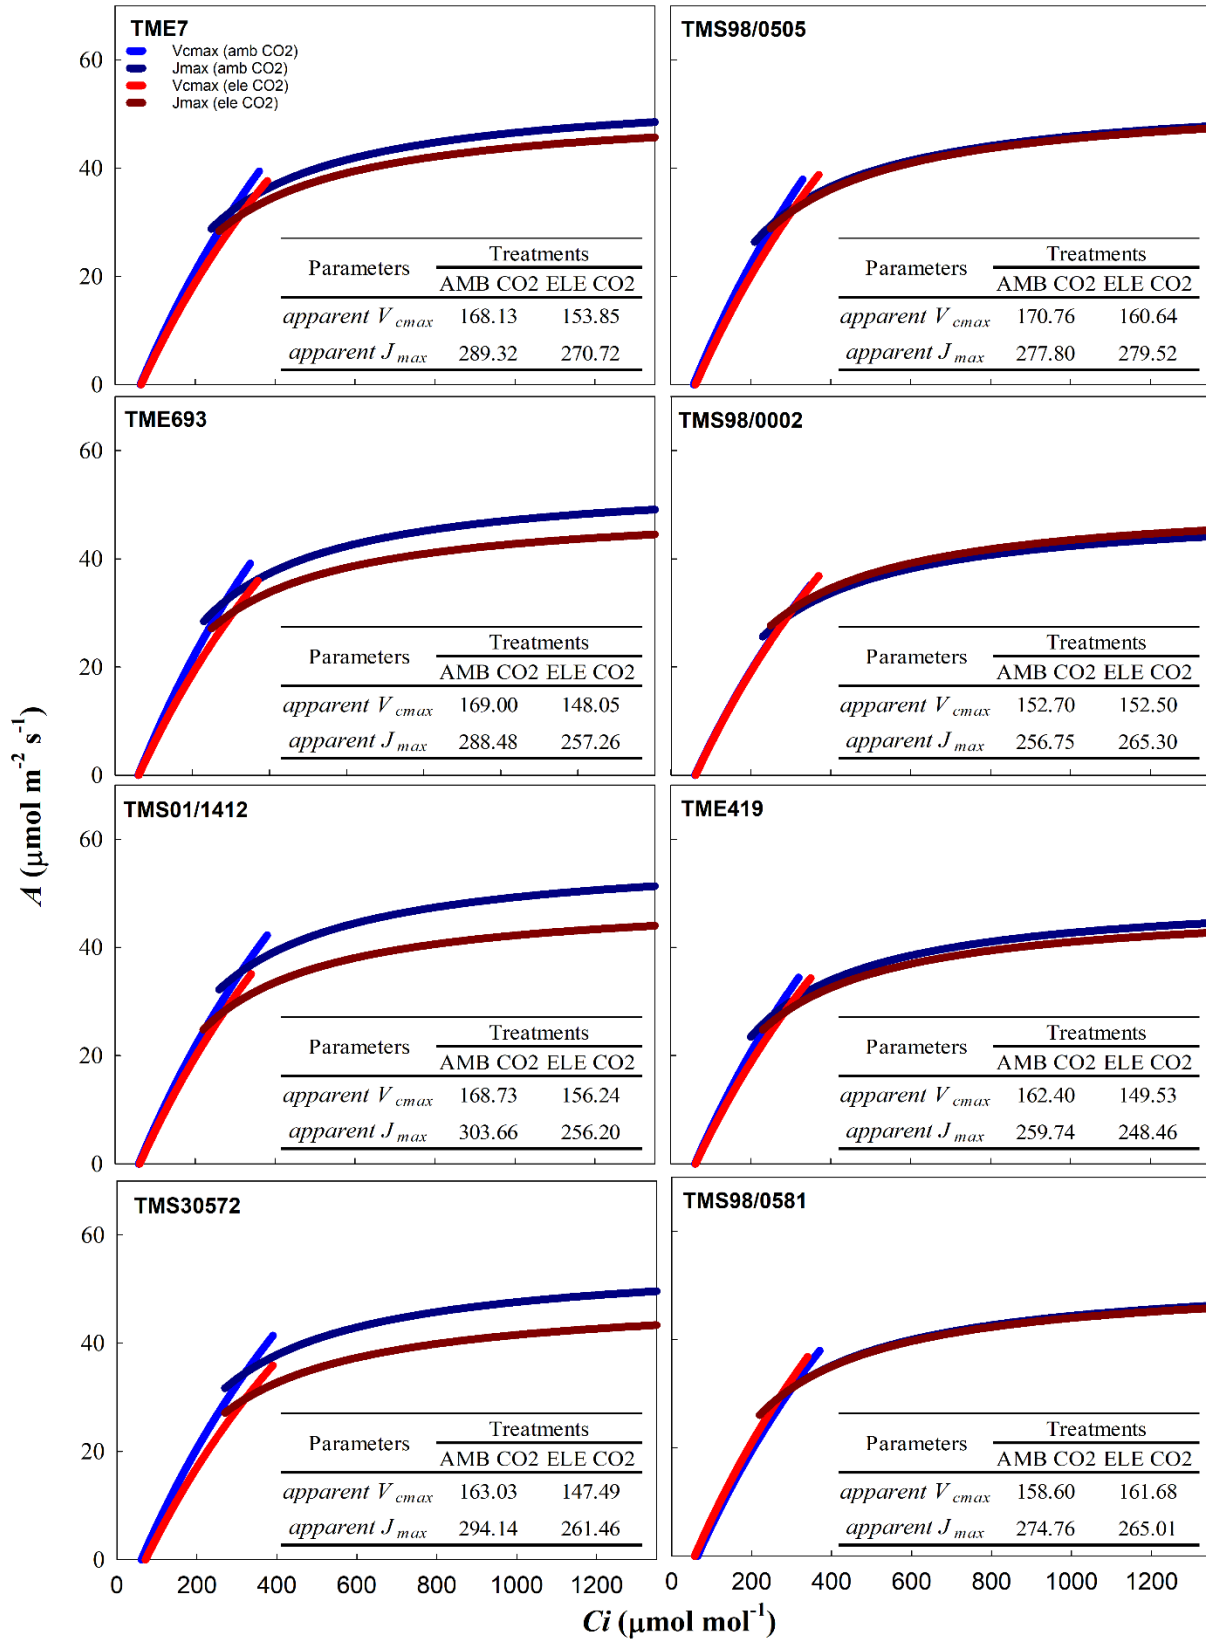

Figure S3. Fitted responses of  $A/C_i$  curves at 28°C from eight cultivars of cassava grown at ambient (AMB CO<sub>2</sub>) and elevated [CO<sub>2</sub>] (ELE CO<sub>2</sub>) during the day of the year (DOY) 226-229. The mean apparent  $V_{cmax}$  ( $\mu\text{mol m}^{-2} \text{s}^{-1}$ , SE <5.6-16.2>) and apparent  $J_{max}$  ( $\mu\text{mol m}^{-2} \text{s}^{-1}$ , se <9.4-27.6>) are indicated in the inserted tables. Elevated CO<sub>2</sub> had non-significant effect in apparent  $V_{cmax}$  and apparent  $J_{max}$ . Ambient [CO<sub>2</sub>] treatments are represented by blue lines and the elevated [CO<sub>2</sub>] treatments by red lines. The data to which the lines are fit are in Supplementary Dataset 1. Mean leaf temperature for the raw data was between 29.1°C for TMS30572 and 30.3°C for TME419.



DOY 267-269

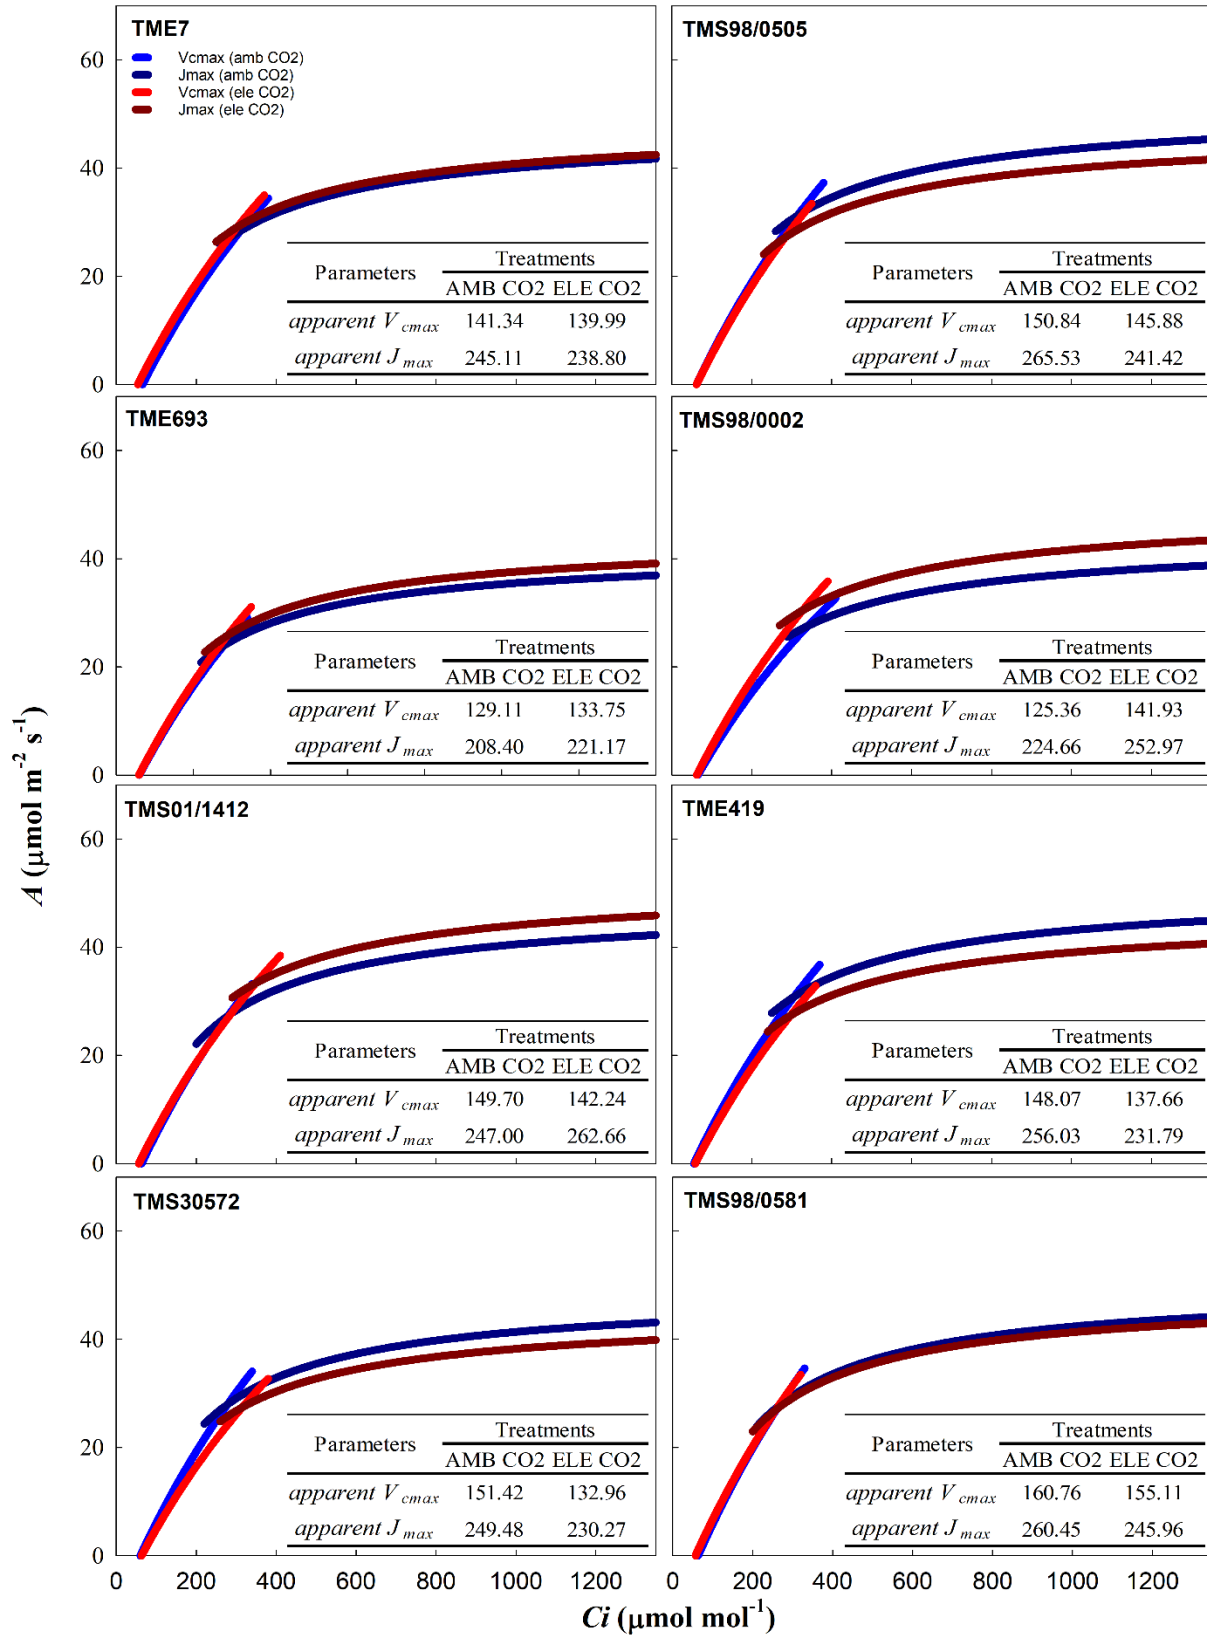

Figure S4. Fitted responses of  $A/C_i$  curves at 28°C from eight cultivars of cassava grown at ambient (AMB CO<sub>2</sub>) and elevated [CO<sub>2</sub>] (ELE CO<sub>2</sub>) during the day of the year (DOY) 267-269. The mean apparent  $V_{cmax}$  ( $\mu\text{mol m}^{-2} \text{s}^{-1}$ , SE <3.2-12.9>) and apparent  $J_{max}$  ( $\mu\text{mol m}^{-2} \text{s}^{-1}$ , se <6.7-19.5>) are indicated in the inserted tables. Elevated CO<sub>2</sub> had non-significant effect in apparent  $V_{cmax}$  and apparent  $J_{max}$ . Ambient [CO<sub>2</sub>] treatments are represented by blue lines and the elevated [CO<sub>2</sub>] treatments by red lines. The data to which the lines are fit are in Supplementary Dataset 1. Mean leaf temperature for the raw data was between 30.7°C for TME7 and 32.5°C for TMS98/0581

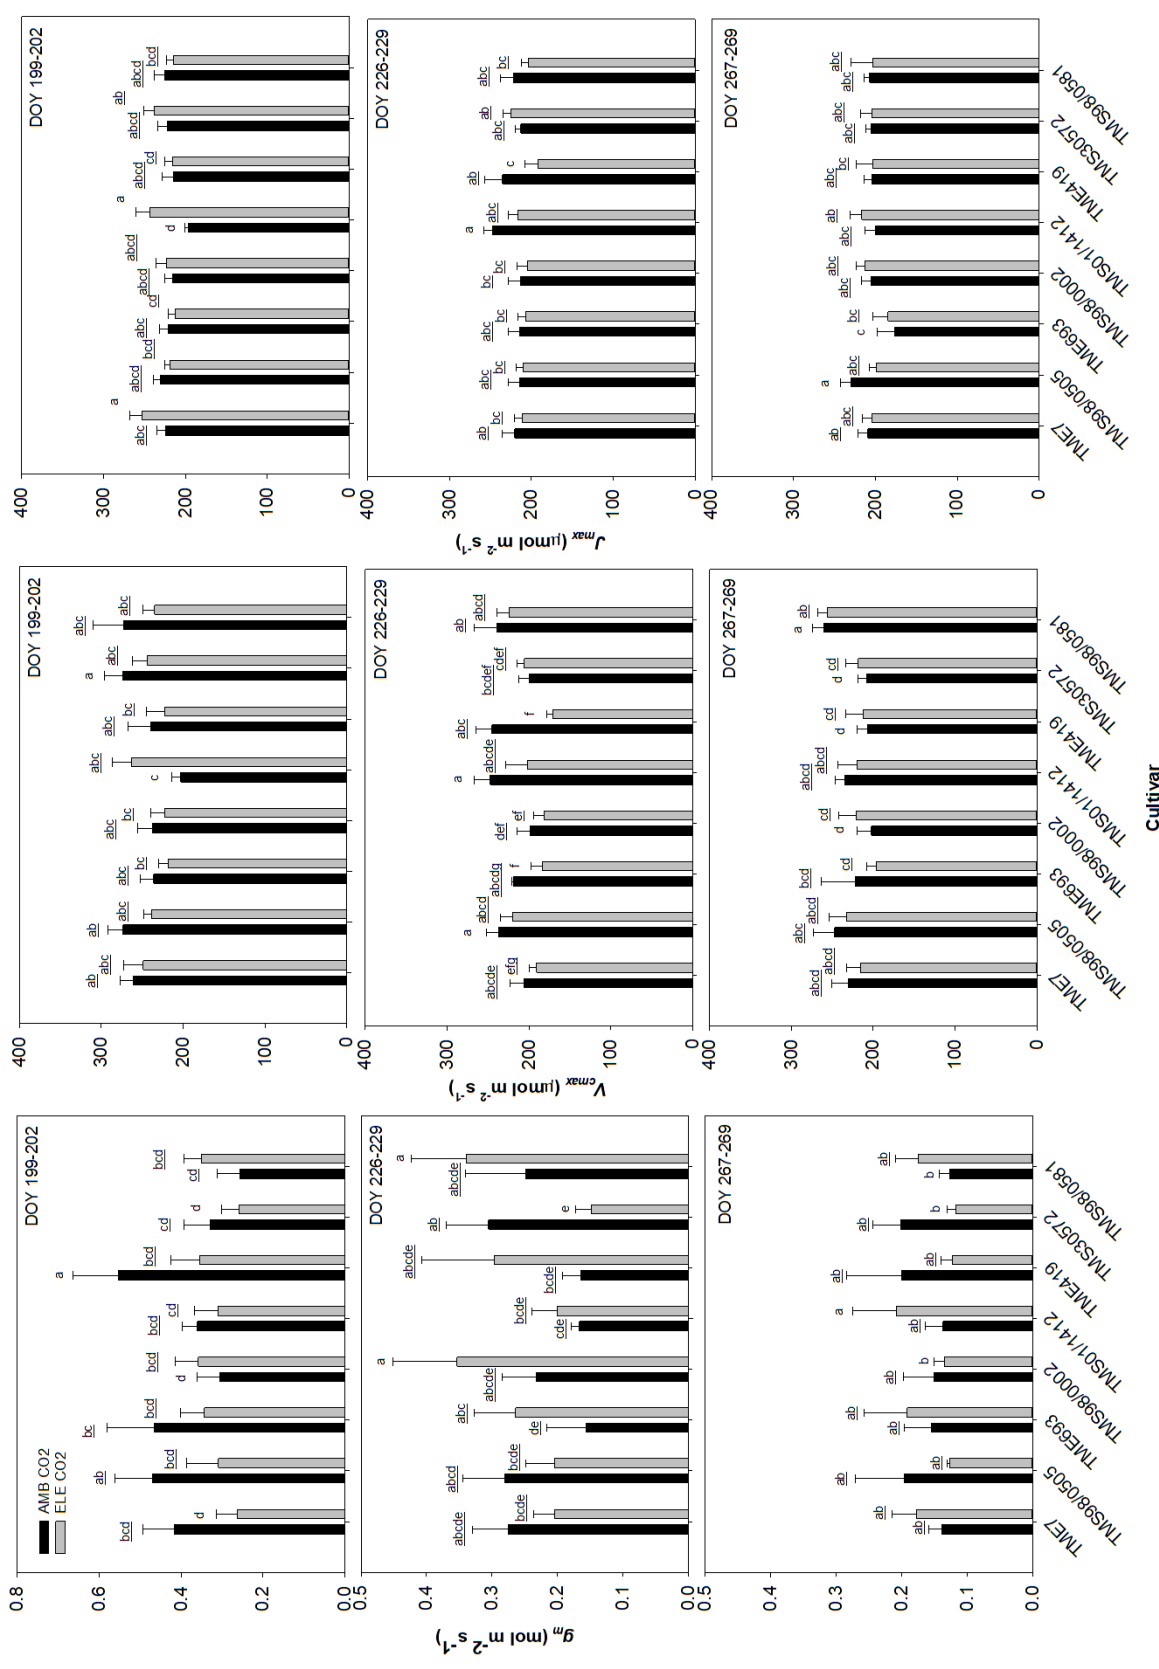

Figure S5. Per day average of photosynthetic parameters. Mesophyll conductance ( $g_m$ ,  $\text{mol m}^{-2} \text{s}^{-1}$ ), the maximum carboxylation rate by Rubisco ( $V_{cmax}$ ,  $\mu\text{mol m}^{-2} \text{s}^{-1}$ ) and the regeneration of ribulose-1,5-biphosphate controlled by the electron transport rate ( $J_{max}$ ,  $\mu\text{mol m}^{-2} \text{s}^{-1}$ ) at 28°C from eight cultivars of cassava grown at ambient (AMB CO<sub>2</sub>) and elevated [CO<sub>2</sub>] (ELE CO<sub>2</sub>). The days of the year (DOY) when the measurements were taken are indicated in each panel. Error bars are mean  $\pm$  standard error (SE; n=4). Treatments with different letters represent significant differences ( $p < 0.1$ ), underlying is used to help differentiate group of letters.

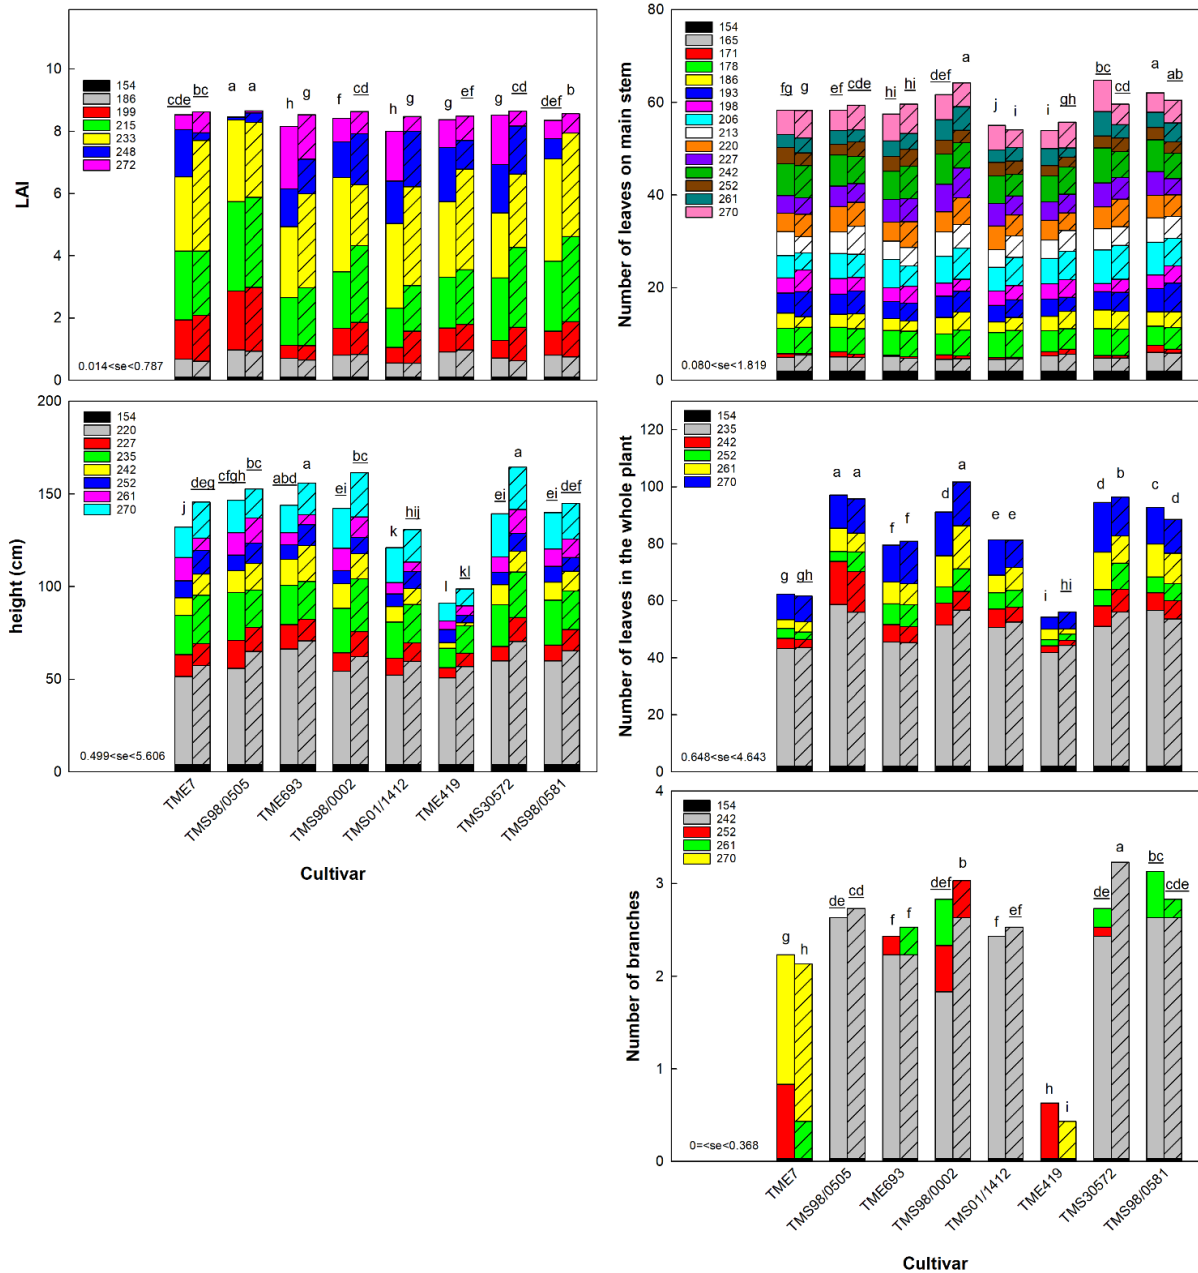

Figure S6. Per day average of growth parameters taken in eight cultivars of cassava grown at ambient (AMB CO<sub>2</sub>) and elevated [CO<sub>2</sub>] (ELE CO<sub>2</sub>). Leaf area index (LAI; m<sup>2</sup> m<sup>-2</sup>), height (cm), number of leaves in the main stem and whole plant, and number of branches. The days of the year (DOY) when the measurements were taken are indicated in each panel and are represented with a different color. DOY 154 is the starting day or day of planting. For LAI, only 6 of 11 measurements days are shown. Error bars are mean ± standard error (SE; n=4).

Treatments with different letters represent significant differences ( $p < 0.1$ ) for the seasonal results, underlying is used to help differentiate group of letters

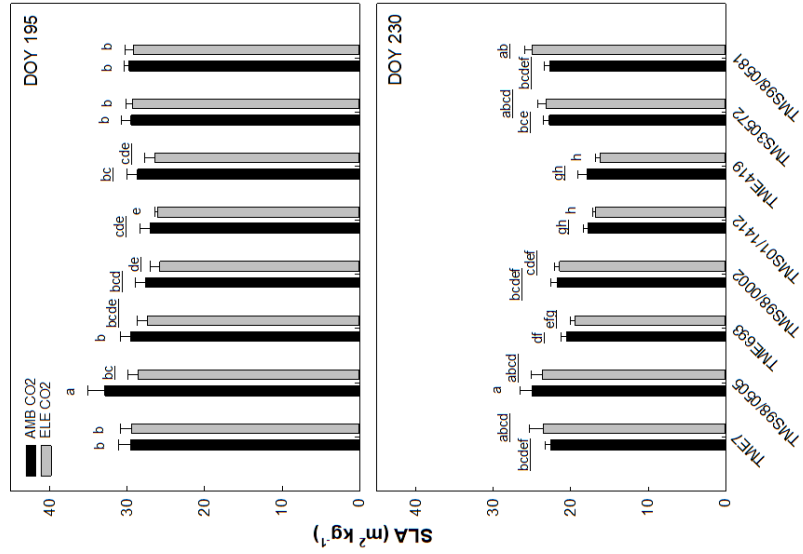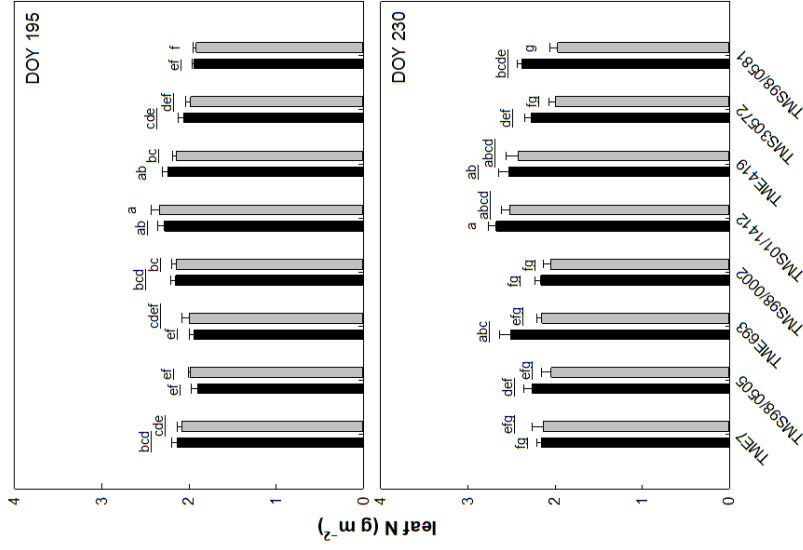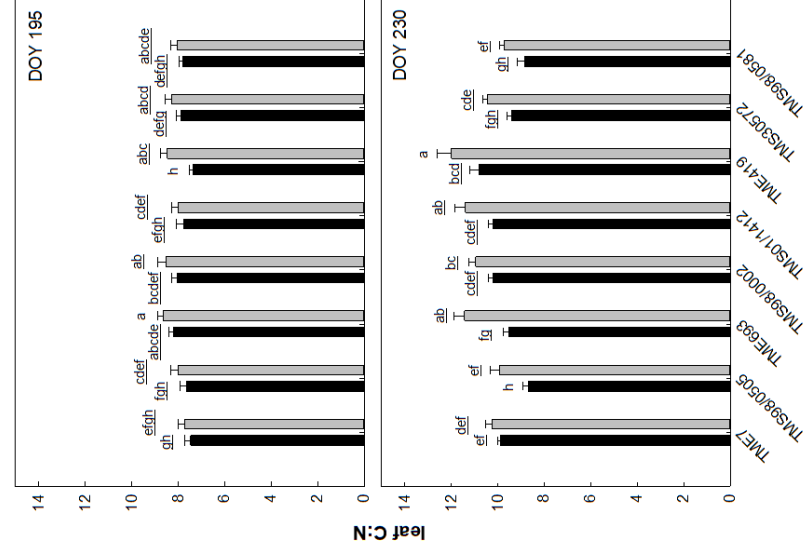

Cultivar

Figure S7. Per day average of the specific leaf area (SLA;  $\text{m}^2 \text{kg}^{-1}$ ), leaf nitrogen ( $\text{g m}^{-2}$ ), and carbon vs. nitrogen ratio (C:N) from eight cultivars of cassava grown at ambient (AMB  $\text{CO}_2$ ) and elevated [ $\text{CO}_2$ ] (ELE  $\text{CO}_2$ ). The days of the year (DOY) when the measurements were taken are indicated in each panel. Error bars are mean  $\pm$  standard error (SE;  $n=4$ ). Treatments with different letters represent significant differences ( $p<0.1$ ), underlying is used to help differentiate group of letters.



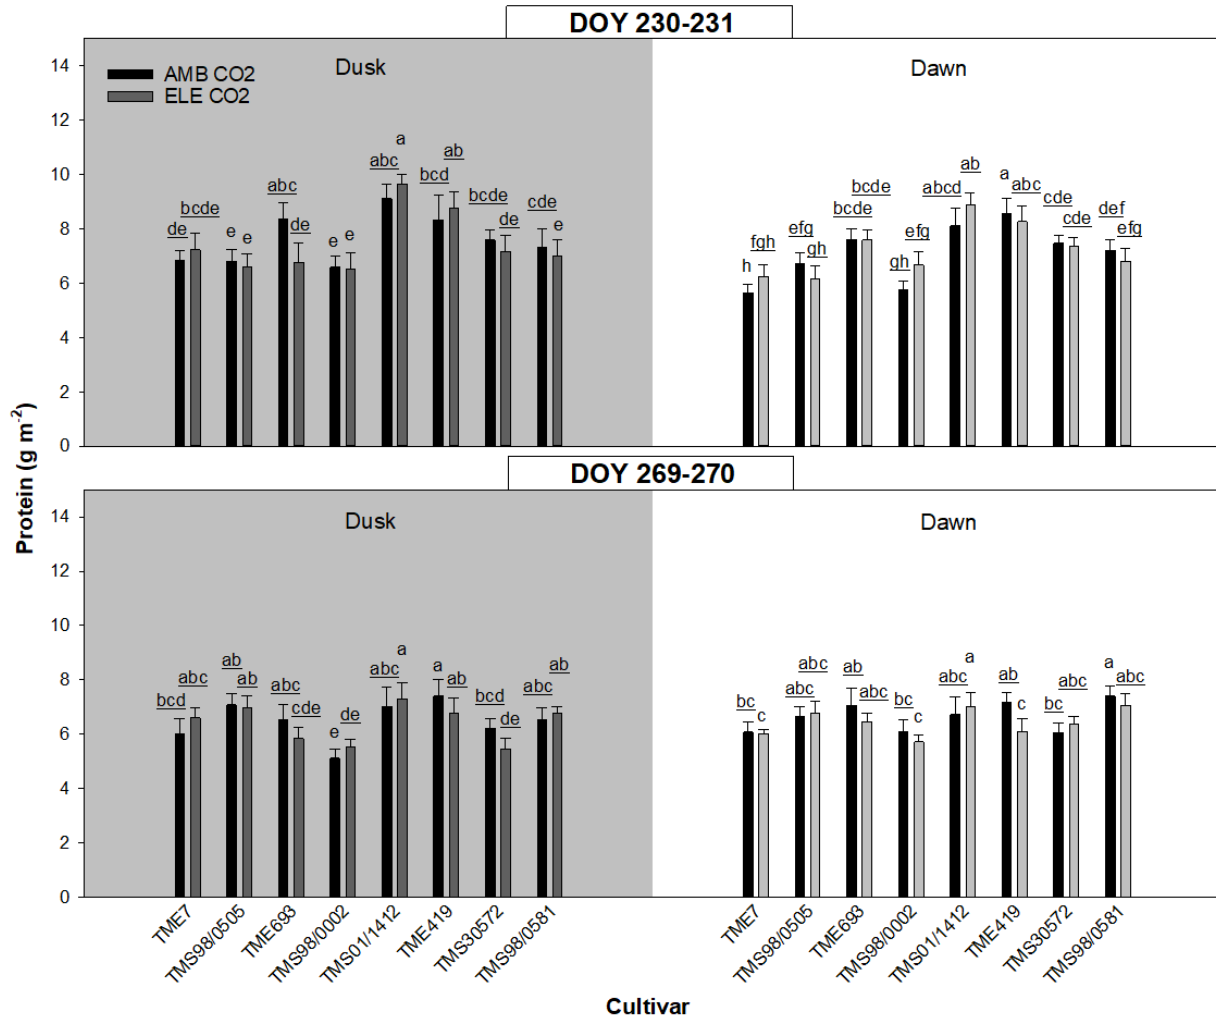

Figure S8. Per day average of the leaf protein content ( $\text{g m}^{-2}$ ) at dusk and dawn from eight cultivars of cassava grown at ambient (AMB CO<sub>2</sub>) and elevated [CO<sub>2</sub>] (ELE CO<sub>2</sub>). The days of the year (DOY) when the measurements were taken are indicated at the top each of panel. Error bars are mean  $\pm$  standard error (SE; n=4). Treatments with different letters represent significant differences ( $p < 0.1$ ), underlying is used to help differentiate group of letters.

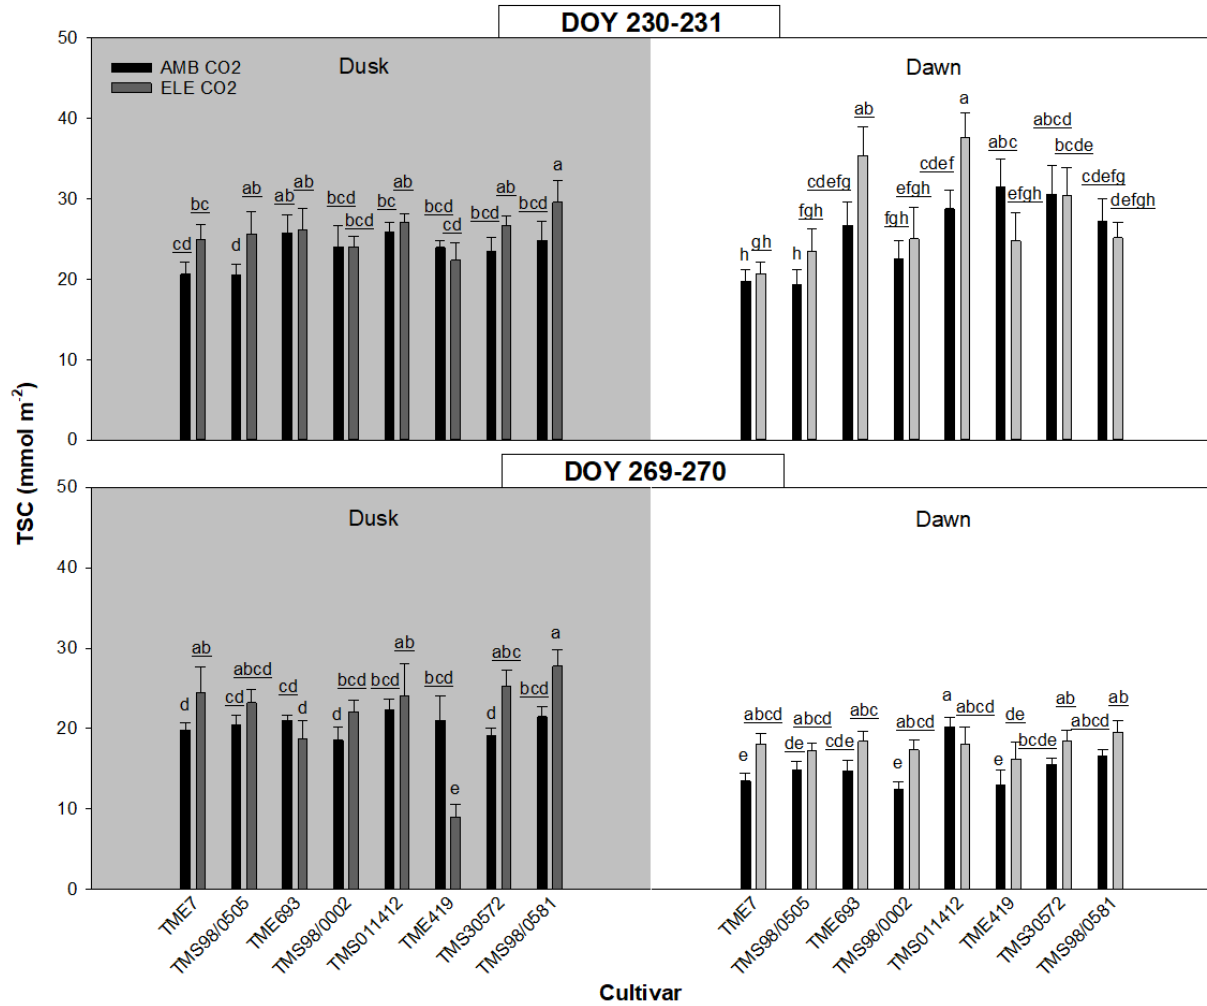

Figure S9. Per day average of the total soluble carbohydrates (TSC, mmol m<sup>-2</sup>) at dusk and dawn from eight cultivars of cassava grown at ambient (AMB CO<sub>2</sub>) and elevated [CO<sub>2</sub>] (ELE CO<sub>2</sub>). The days of the year (DOY) when the measurements were taken are indicated at the top each of panel. Error bars are mean ± standard error (SE; n=4). Treatments with different letters represent significant differences (*p*<0.1), underlying is used to help differentiate group of letters.

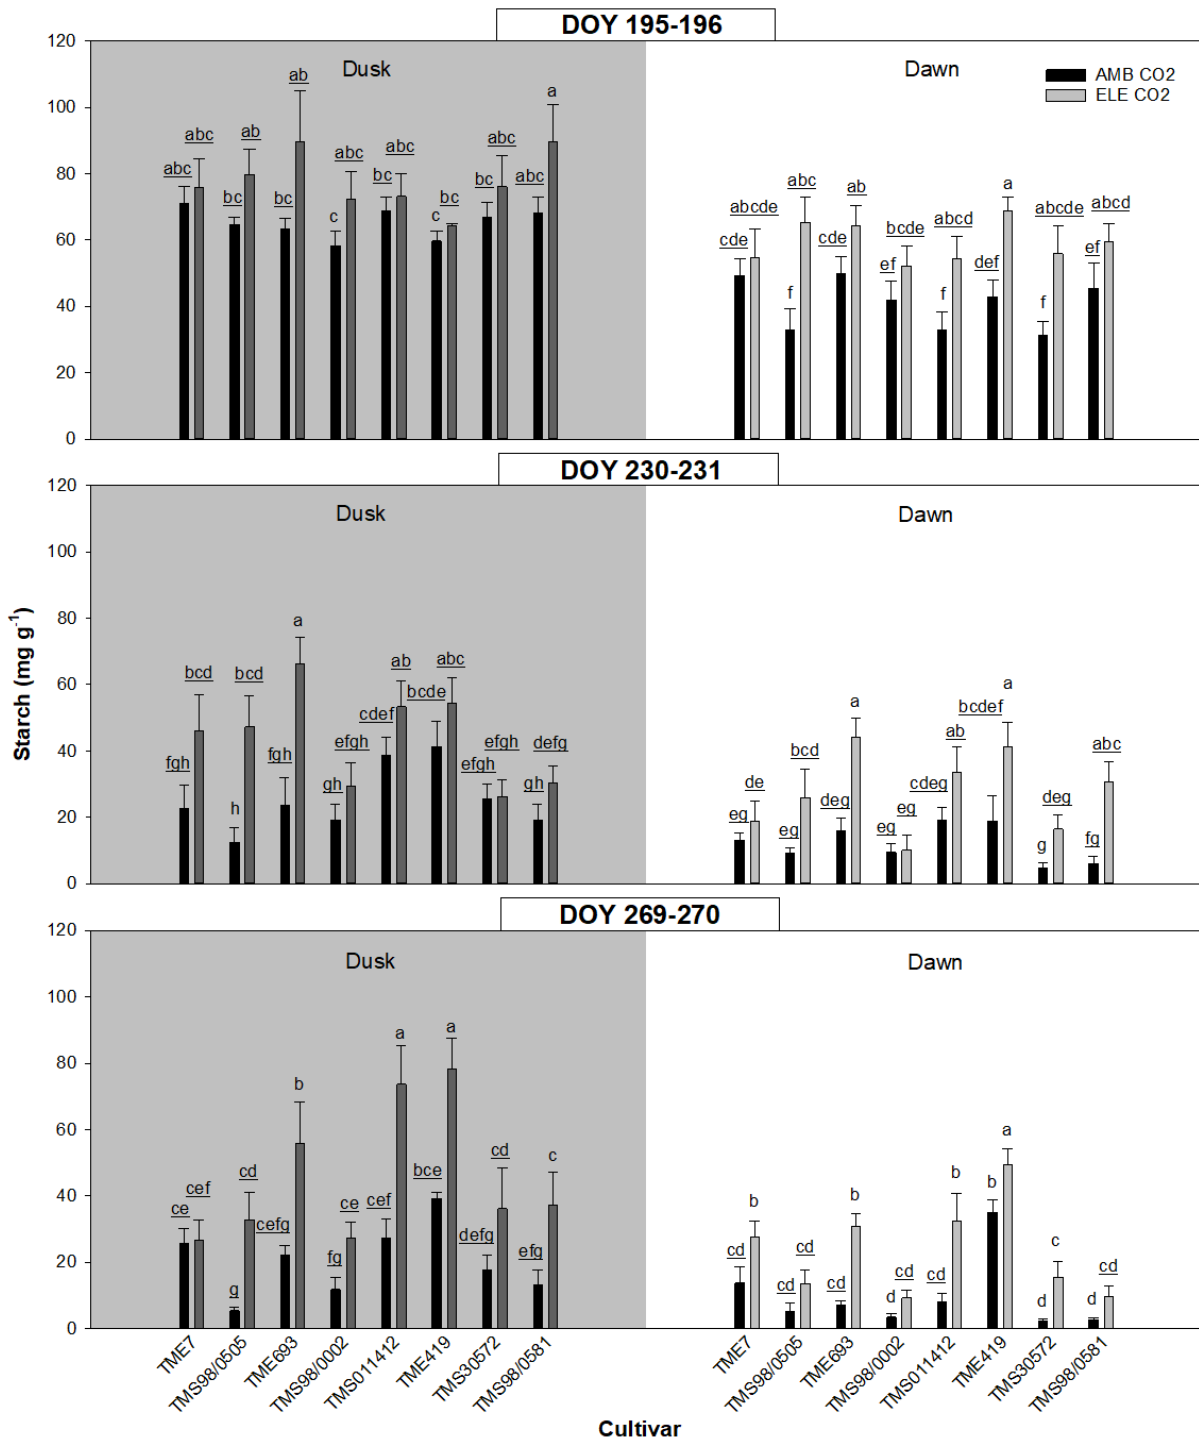

Figure S10. Per day average of the starch (mmol m<sup>-2</sup>) at dusk and dawn from eight cultivars of cassava grown at ambient (AMB CO<sub>2</sub>) and elevated [CO<sub>2</sub>] (ELE CO<sub>2</sub>). The days of the year (DOY) when the measurements were taken are indicated at the top each of panel. Error bars are

mean  $\pm$  standard error (SE; n=4). Treatments with different letters represent significant differences ( $p < 0.1$ ), underlying is used to help differentiate group of letters.

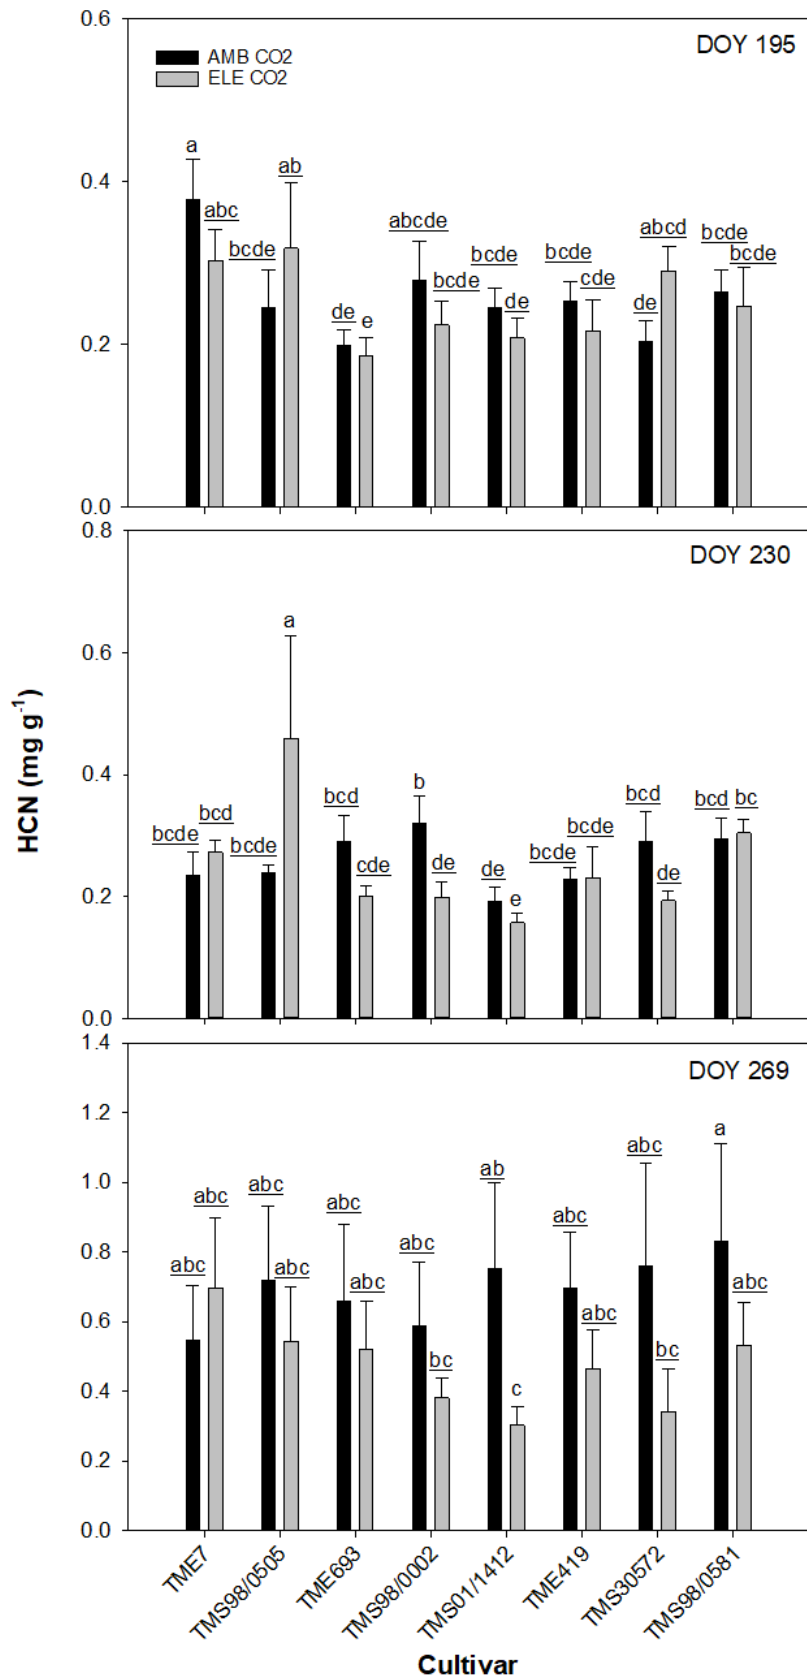

Figure S11. Per day average of the hydrogen cyanide content in leaves ( $\text{mg g}^{-1}$ ) from eight cultivars of cassava grown at ambient (AMB  $\text{CO}_2$ ) and elevated [ $\text{CO}_2$ ] (ELE  $\text{CO}_2$ ). The days of the year (DOY) when the measurements were taken are indicated in each panel. Error bars are mean  $\pm$  standard error (SE;  $n=4$ ). Treatments with different letters represent significant differences ( $p<0.1$ ), underlying is used to help differentiate group of letters.

### Final harvest

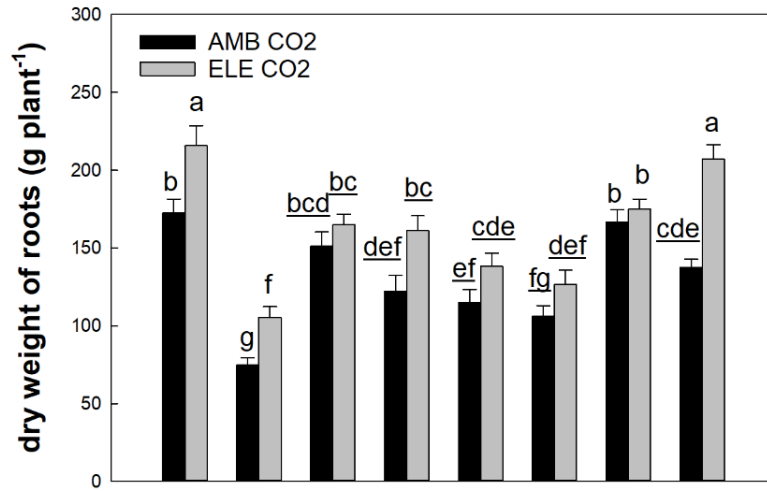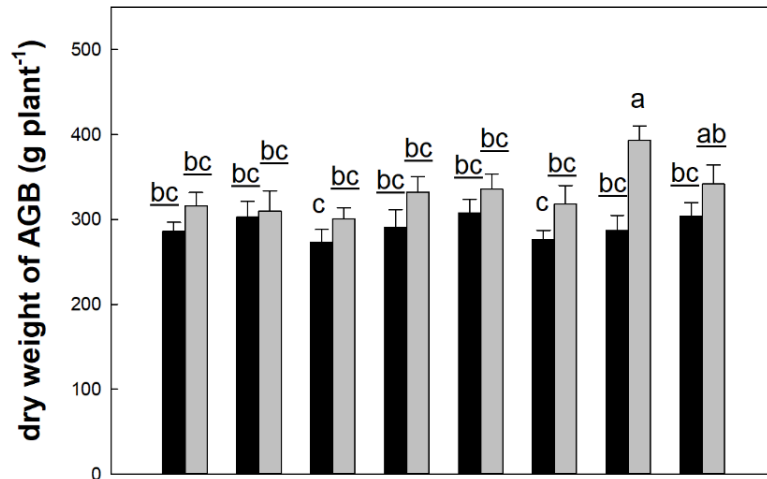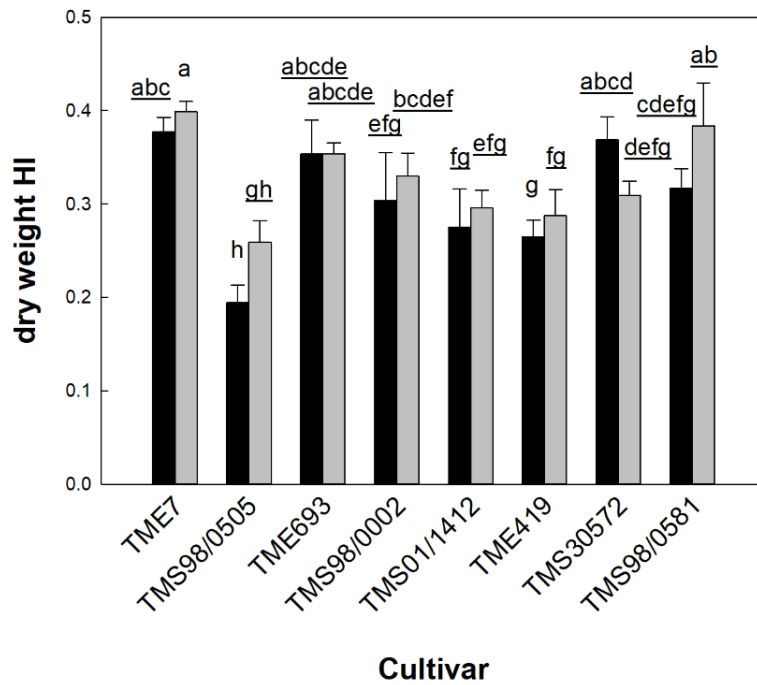

Figure S12. Dry weight from the biomass of eight cultivars of cassava grown at ambient (AMB CO<sub>2</sub>) and elevated [CO<sub>2</sub>] (ELE CO<sub>2</sub>) during the final harvest. Dry weight of root (g plant<sup>-1</sup>), dry weight of the above-ground biomass (AGB, g plant<sup>-1</sup>), and harvest index (HI). Error bars are mean ± standard error (SE; n=4). Treatments with different letters represent significant differences ( $p < 0.1$ ), underlying is used to help differentiate group of letters.



### Final harvest data

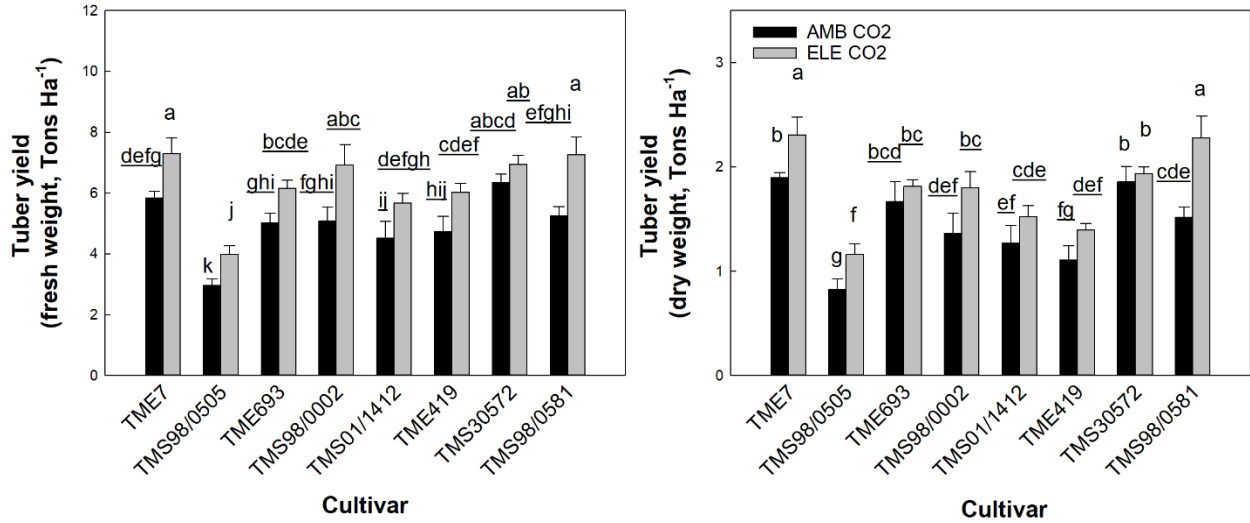

Figure S13. Tuber yield (Tons Ha<sup>-1</sup>) calculated for the fresh and dry weight of tubers of eight cultivars of cassava grown at ambient (AMB CO<sub>2</sub>) and elevated [CO<sub>2</sub>] (ELE CO<sub>2</sub>) during the final harvest. Error bars are mean ± standard error (SE; n=4). Treatments with different letters represent significant differences ( $p < 0.1$ ), underlining is used to help differentiate group of letters.

Table S1. Principal component loadings from principal component 1 (PC1) and principal component 2 (PC2) for each one of the parameters considered in this analysis. Values in bold are the main contributors for each PC, and are the only ones represented with an arrow in Figure 2.

| Type of measurements       | Parameter                           | PC1            | PC2            |
|----------------------------|-------------------------------------|----------------|----------------|
| Gas exchange               | $A$                                 | <b>0.75175</b> | -0.0163        |
|                            | $g_s$                               | <b>-0.8527</b> | -0.0036        |
|                            | iWUE                                | <b>0.92065</b> | 0.08011        |
|                            | $C_i$                               | <b>0.81698</b> | -0.0351        |
|                            | <i>apparent</i> $V_{cmax}$          | -0.7123        | 0.06686        |
|                            | <i>apparent</i> $J_{max}$           | -0.5489        | 0.24197        |
|                            | $g_m$                               | -0.3761        | -0.2049        |
|                            | $V_{cmax}$                          | -0.699         | 0.49735        |
| Plant growth               | $J_{max}$                           | -0.3136        | 0.35618        |
|                            | LAI                                 | 0.59478        | 0.37121        |
|                            | Height                              | 0.38192        | <b>0.81158</b> |
|                            | Number of leaves in main stem       | 0.25649        | 0.65194        |
|                            | Number of leaves in the whole plant | 0.09455        | <b>0.78544</b> |
|                            | Number of branches                  | 0.1098         | <b>0.83738</b> |
| Plant material composition | SLA                                 | -0.2481        | <b>0.7911</b>  |
|                            | Leaf N                              | -0.408         | -0.6799        |
|                            | Leaf C:N                            | 0.74265        | -0.5719        |
|                            | Protein                             | -0.1697        | -0.4652        |
|                            | TSC turnover                        | -0.327         | 0.65525        |
|                            | Starch turnover                     | 0.20133        | 0.18136        |
|                            | HCN in leaves                       | -0.6206        | 0.21296        |
|                            | HCN in peel of roots                | 0.17509        | -0.4873        |
| HCN in core of roots       | -0.1774                             | 0.33419        |                |
| Harvested and yield        | Fresh weight roots                  | <b>0.76809</b> | -0.0605        |
|                            | Fresh weight AGB                    | 0.46195        | <b>0.79477</b> |
|                            | Fresh weight HI                     | 0.47881        | -0.4896        |
|                            | Dry weight roots                    | 0.66134        | 0.1045         |
|                            | Dry weight AGB                      | 0.63988        | 0.35458        |
|                            | Dry weight HI                       | 0.51376        | -0.0008        |

| set of measurements | DOY     | Parameters                       | Main effects       |       |                         |
|---------------------|---------|----------------------------------|--------------------|-------|-------------------------|
|                     |         |                                  | [CO <sub>2</sub> ] | cv    | [CO <sub>2</sub> ] x cv |
| 1st                 | 195     | <i>A</i>                         | <0.0001            | ns    | ns                      |
|                     |         | <i>g<sub>s</sub></i>             | 0.026              | 0.041 | ns                      |
|                     |         | iWUE                             | <0.0001            | 0.005 | 0.095                   |
|                     |         | <i>C<sub>i</sub></i>             | <0.0001            | 0.005 | ns                      |
|                     | 199-202 | <i>apparent V<sub>cmax</sub></i> | 0.023              | ns    | ns                      |
|                     |         | <i>apparent J<sub>max</sub></i>  | ns                 | ns    | 0.038                   |
|                     |         | <i>g<sub>m</sub></i>             | ns                 | 0.024 | ns                      |
|                     |         | <i>V<sub>cmax</sub></i>          | ns                 | ns    | ns                      |
|                     |         | <i>J<sub>max</sub></i>           | ns                 | ns    | ns                      |
|                     |         |                                  |                    |       |                         |
| 2nd                 | 230     | <i>A</i>                         | <0.0001            | 0.005 | ns                      |
|                     |         | <i>g<sub>s</sub></i>             | ns                 | 0.077 | ns                      |
|                     |         | iWUE                             | <.0001             | 0.014 | ns                      |
|                     |         | <i>C<sub>i</sub></i>             | <0.0001            | 0.012 | ns                      |
|                     | 226-229 | <i>apparent V<sub>cmax</sub></i> | ns                 | ns    | ns                      |
|                     |         | <i>apparent J<sub>max</sub></i>  | ns                 | ns    | ns                      |
|                     |         | <i>g<sub>m</sub></i>             | ns                 | ns    | 0.054                   |
|                     |         | <i>V<sub>cmax</sub></i>          | ns                 | 0.040 | ns                      |
|                     |         | <i>J<sub>max</sub></i>           | ns                 | ns    | ns                      |
|                     |         |                                  |                    |       |                         |
| 3rd                 | 269     | <i>A</i>                         | <0.0001            | 0.049 | ns                      |
|                     |         | <i>g<sub>s</sub></i>             | 0.033              | 0.026 | ns                      |
|                     |         | iWUE                             | <0.001             | 0.074 | ns                      |
|                     |         | <i>C<sub>i</sub></i>             | 0.001              | 0.084 | ns                      |
|                     | 267-269 | <i>apparent V<sub>cmax</sub></i> | ns                 | 0.012 | ns                      |
|                     |         | <i>apparent J<sub>max</sub></i>  | ns                 | 0.036 | ns                      |
|                     |         | <i>g<sub>m</sub></i>             | ns                 | ns    | ns                      |
|                     |         | <i>V<sub>cmax</sub></i>          | ns                 | 0.030 | ns                      |
|                     |         | <i>J<sub>max</sub></i>           | ns                 | ns    | ns                      |
|                     |         |                                  |                    |       |                         |

Table S2. Statistical analysis (complete block analysis of variance, ANOVA) for the daily average of the following parameters: photosynthetic carbon uptake ( $A$ ,  $\mu\text{mol CO}_2 \text{ m}^{-2}\text{s}^{-1}$ ), stomatal conductance ( $g_s$ ,  $\text{mol H}_2\text{O m}^{-2}\text{s}^{-1}$ ), intrinsic water use efficiency (iWUE,  $\mu\text{mol mol}^{-1}$ ),  $[\text{CO}_2]$  inside the leaf ( $C_i$ ,  $\mu\text{mol mol}^{-1}$ ), “apparent” maximum rate of carboxylation by Rubisco (apparent  $V_{cmax}$ ,  $\mu\text{mol m}^{-2} \text{ s}^{-1}$ ) and “apparent” maximum rate of photosynthetic electron transport (apparent  $J_{max}$ ,  $\mu\text{mol m}^{-2} \text{ s}^{-1}$ ), mesophyll conductance ( $g_m$ ,  $\text{mol m}^{-2} \text{ s}^{-1}$ ),  $V_{cmax}$  and  $J_{max}$ . “Set of measurements” refers to the number of campaigns done to collect the parameters. The main effects are:  $[\text{CO}_2]$ , cultivar (cv), and their interaction. Significant differences ( $p < 0.1$ ) and non-statistical significance (ns) are shown in the table.

| set of measurements | DOY     | Parameters      | Main effects       |         |                         |
|---------------------|---------|-----------------|--------------------|---------|-------------------------|
|                     |         |                 | [CO <sub>2</sub> ] | cv      | [CO <sub>2</sub> ] x cv |
| 1st                 | 195-196 | SLA             | 0.099              | 0.002   | ns                      |
|                     |         | leaf N          | ns                 | <0.0001 | ns                      |
|                     |         | C:N             | 0.044              | 0.008   | ns                      |
|                     |         | starch dusk     | 0.007              | ns      | ns                      |
|                     |         | starch dawn     | <0.0001            | ns      | ns                      |
|                     |         | starch turnover | 0.006              | 0.078   | ns                      |
|                     |         | HCN in leaves   | ns                 | 0.031   | ns                      |
| 2nd                 | 230-231 | SLA             | ns                 | <0.0001 | ns                      |
|                     |         | leaf N          | ns                 | <0.0001 | ns                      |
|                     |         | C:N             | <0.0001            | <0.0001 | ns                      |
|                     |         | protein dusk    | ns                 | <0.001  | ns                      |
|                     |         | protein dawn    | ns                 | <0.0001 | ns                      |
|                     |         | TSC dusk        | 0.016              | ns      | ns                      |
|                     |         | TSC dawn        | ns                 | <0.0001 | 0.067                   |
|                     |         | starch dusk     | <0.001             | 0.002   | ns                      |
|                     |         | starch dawn     | <0.0001            | 0.001   | ns                      |
|                     |         | TSC turnover    | ns                 | 0.005   | ns                      |
|                     |         | starch turnover | ns                 | ns      | ns                      |
| HCN in leaves       | ns      | 0.021           | 0.010              |         |                         |
| 3rd                 | 269-270 | protein dusk    | ns                 | <0.001  | ns                      |
|                     |         | protein dawn    | ns                 | ns      | ns                      |
|                     |         | TSC dusk        | ns                 | 0.002   | 0.002                   |
|                     |         | TSC dawn        | 0.002              | 0.063   | ns                      |
|                     |         | starch dusk     | <0.0001            | <0.0001 | 0.050                   |
|                     |         | starch dawn     | <0.0001            | <0.0001 | ns                      |
|                     |         | TSC turnover    | ns                 | ns      | 0.039                   |
|                     |         | starch turnover | 0.001              | 0.061   | 0.016                   |
| HCN in leaves       | 0.022   | ns              | ns                 |         |                         |

Table S3. Statistical analysis (complete block analysis of variance, ANOVA) for the daily average of the following parameters: leaf area index (LAI, m<sup>2</sup> m<sup>-2</sup>), height (cm), number of leaves in the main stem and in the whole plant, number of branches, specific leaf area (SLA, m<sup>2</sup> kg<sup>-1</sup>), leaf nitrogen (g m<sup>-2</sup>), carbon vs. nitrogen ratio (C:N), protein content (at dusk and dawn; g m<sup>-2</sup>), total soluble carbohydrates (TSC, mmol m<sup>-2</sup>) and starch (mg g<sup>-1</sup>) at dusk and dawn, TSC

and starch turnover, and hydrogen cyanide (HCN) content of leaves, root peel and core ( $\text{mg g}^{-1}$ ). “Set of measurements” refers to the number of campaigns done to collect the parameters. The main effects are:  $[\text{CO}_2]$ , cultivar (cv), and their interaction. Significant differences ( $p < 0.1$ ) and non-statistical significance (ns) are shown in the table.
